# Supplementary material
Source: PubMed Central journal article supplement (PMC7556983)
Supplement: NIHMS1627614-supplement-Appendix_1_Supplemental_Material.pdf [file NIHMS1627614-supplement-Appendix_1_Supplemental_Material.pdf]

## Supplemental Figures and Tables

| Variable name                      | Significant effect in TEDDY (ref) | Effect outside of TEDDY (ref) | ROC AUC (95%CI) to predict T1D | p-value for Cox model |
|------------------------------------|-----------------------------------|-------------------------------|--------------------------------|-----------------------|
| Sex                                | 53                                | 54,55                         | 0.50 (0.47-0.54)               | 0.88                  |
| Probiotic                          | 53,56                             | 57                            | 0.51 (0.49-0.53)               | 0.66                  |
| Common cold days                   | 26                                | 58,59                         | 0.50 (0.47-0.56)               | 0.098                 |
| Influenza episodes                 | 60                                | 58,59                         | 0.51 (0.49-0.52)               | 0.69                  |
| Respiratory episodes               | 60                                | 58,59                         | 0.51 (0.47-0.55)               | 0.32                  |
| Fever episodes                     | 60                                | 58                            | 0.51 (0.47-0.55)               | 0.80                  |
| Laryngitis tracheitis episodes     | 60                                | 58,59                         | 0.51 (0.48-0.53)               | 0.45                  |
| Acute sinusitis episodes           | 60                                | 58,59                         | 0.51 (0.49-0.53)               | <b>0.03</b>           |
| Caesarean section                  | 61                                | 62-66                         | 0.52 (0.48-0.55)               | 0.27                  |
| Gestational respiratory infections | 61                                | 67,68                         | 0.52 (0.49-0.56)               | 0.99                  |
| Mother T1D                         | 26                                | 27,55                         | 0.51 (0.49-0.53)               | <b>0.03</b>           |
| Father T1D                         | 26                                | 27,55                         | 0.53 (0.51-0.56)               | <b>1.2e-05</b>        |
| Siblings T1D                       | 26                                | 27,55                         | 0.54 (0.52-0.56)               | <b>1.7e-08</b>        |
| Zscore weight 1y                   | 26,69                             | 70,71                         | 0.54 (0.51-0.59)               | <b>0.006</b>          |
| Country                            | 26,72                             | 54,73,74                      | 0.55 (0.51-0.59)               | <b>0.03</b>           |
| Any FH T1D                         | 53                                | 27,55                         | 0.56 (0.53-0.59)               | <b>1e-08</b>          |
| IA2A                               | 22                                | 1,29,75                       | 0.59 (0.56-0.62)               | <b>7.9e-57</b>        |
| GAD                                | 22                                | 1,29,75                       | 0.65 (0.62-0.68)               | <b>1.8e-81</b>        |
| GRS2                               | -                                 | 24                            | 0.73 (0.7-0.77)                | <b>2.8e-36</b>        |
| MIAA                               | 53                                | 1,28                          | 0.73 (0.69-0.76)               | <b>3.7e-119</b>       |
| AB number                          | 53                                | 1,29,75                       | 0.75 (0.71-0.78)               | <b>5.5e-136</b>       |

**Table S1-** Variables previously shown or susceptible to be T1D- or T1D autoantibody associated now evaluated in univariate analysis. Time ROC AUC and p-value are computed at landmark 2 years old and horizon time of 8 years.

| a        |           |                     |                     |                     |                     | b        |           |                     |                     |                     |                     |
|----------|-----------|---------------------|---------------------|---------------------|---------------------|----------|-----------|---------------------|---------------------|---------------------|---------------------|
| landmark | 7 years   | 0.77<br>(0.57-0.96) | 0.76<br>(0.69-0.83) | 0.68<br>(0.6-0.77)  |                     | landmark | 7 years   | 0.78<br>(0.58-0.97) | 0.76<br>(0.68-0.84) | 0.72<br>(0.66-0.77) |                     |
|          | 6 years   | 0.79<br>(0.58-1)    | 0.75<br>(0.64-0.86) | 0.72<br>(0.63-0.82) |                     |          | 6 years   | 0.78<br>(0.55-1)    | 0.75<br>(0.65-0.86) | 0.74<br>(0.65-0.83) |                     |
|          | 5 years   | 0.73<br>(0.53-0.92) | 0.76<br>(0.66-0.86) | 0.75<br>(0.66-0.83) | 0.70<br>(0.59-0.8)  |          | 5 years   | 0.73<br>(0.57-0.9)  | 0.76<br>(0.66-0.85) | 0.75<br>(0.67-0.83) | 0.71<br>(0.61-0.82) |
|          | 4 years   | 0.70<br>(0.54-0.86) | 0.75<br>(0.66-0.84) | 0.73<br>(0.66-0.8)  | 0.69<br>(0.61-0.78) |          | 4 years   | 0.70<br>(0.53-0.88) | 0.75<br>(0.66-0.84) | 0.73<br>(0.66-0.8)  | 0.71<br>(0.64-0.79) |
|          | 3 years   | 0.69<br>(0.43-0.95) | 0.73<br>(0.61-0.84) | 0.74<br>(0.65-0.82) | 0.73<br>(0.66-0.8)  |          | 3 years   | 0.73<br>(0.52-0.95) | 0.74<br>(0.62-0.87) | 0.74<br>(0.64-0.84) | 0.74<br>(0.67-0.82) |
|          | 2 years   | 0.68<br>(0.51-0.84) | 0.71<br>(0.63-0.8)  | 0.74<br>(0.66-0.81) | 0.73<br>(0.67-0.79) |          | 2 years   | 0.72<br>(0.56-0.88) | 0.75<br>(0.67-0.82) | 0.76<br>(0.69-0.82) | 0.74<br>(0.69-0.79) |
|          | 18 months | 0.69<br>(0.51-0.86) | 0.71<br>(0.6-0.83)  | 0.72<br>(0.64-0.8)  | 0.73<br>(0.67-0.79) |          | 18 months | 0.75<br>(0.6-0.89)  | 0.75<br>(0.66-0.85) | 0.75<br>(0.69-0.81) | 0.74<br>(0.69-0.79) |
|          | 1 year    | 0.77<br>(0.63-0.91) | 0.72<br>(0.65-0.8)  | 0.73<br>(0.66-0.79) | 0.73<br>(0.67-0.8)  |          | 1 year    | 0.83<br>(0.72-0.93) | 0.78<br>(0.7-0.85)  | 0.76<br>(0.7-0.83)  | 0.75<br>(0.69-0.82) |
|          | 3 months  | 0.81<br>(0.59-1)    | 0.74<br>(0.68-0.8)  | 0.73<br>(0.67-0.79) | 0.73<br>(0.68-0.79) |          | 3 months  | 0.81<br>(0.62-1)    | 0.78<br>(0.72-0.85) | 0.77<br>(0.7-0.83)  | 0.76<br>(0.7-0.81)  |
|          |           | 1 year              | 3 years             | 5 years             | 8 years             |          |           | 1 year              | 3 years             | 5 years             | 8 years             |
|          |           | horizon time        |                     |                     |                     |          |           | horizon time        |                     |                     |                     |

**Table S2:** Comparison of T1D GRS2 alone (Panel a) to T1D GRS2 + FH (Panel b) at 9 different landmark scoring ages and over 4 different horizon times. Although 95% confidence intervals always overlapped, among 34 total combinations, T1D GRS2+FH gave a larger AUC ROC in 24, results were similar in 9, and in only one was T1D GRS better. T1D GRS2 + FH superiority was greatest at landmarks  $\leq 3$  years of age.

| a        |           |                     |                     |                     |                     | b                   |                     |                     |                     |  |  |
|----------|-----------|---------------------|---------------------|---------------------|---------------------|---------------------|---------------------|---------------------|---------------------|--|--|
| landmark | 7 years   | 0.93<br>(0.78-1)    | 0.91<br>(0.82-0.99) | 0.90<br>(0.82-0.97) |                     | 0.94<br>(0.81-1)    | 0.94<br>(0.88-1)    | 0.94<br>(0.89-0.99) |                     |  |  |
|          | 6 years   | 0.94<br>(0.77-1)    | 0.95<br>(0.88-1)    | 0.90<br>(0.83-0.97) |                     | 0.94<br>(0.78-1)    | 0.97<br>(0.93-1)    | 0.94<br>(0.89-0.99) |                     |  |  |
|          | 5 years   | 0.99<br>(0.97-1)    | 0.94<br>(0.88-1)    | 0.90<br>(0.82-0.97) | 0.85<br>(0.78-0.92) | 0.99<br>(0.98-0.99) | 0.95<br>(0.88-1)    | 0.94<br>(0.89-0.99) | 0.90<br>(0.82-0.98) |  |  |
|          | 4 years   | 0.94<br>(0.83-1)    | 0.95<br>(0.89-1)    | 0.92<br>(0.85-0.98) | 0.83<br>(0.77-0.9)  | 0.96<br>(0.9-1)     | 0.97<br>(0.93-1)    | 0.96<br>(0.92-1)    | 0.90<br>(0.83-0.97) |  |  |
|          | 3 years   | 0.92<br>(0.8-1)     | 0.90<br>(0.82-0.98) | 0.88<br>(0.82-0.94) | 0.84<br>(0.79-0.89) | 0.97<br>(0.92-1)    | 0.95<br>(0.91-1)    | 0.93<br>(0.89-0.98) | 0.91<br>(0.87-0.94) |  |  |
|          | 2 years   | 0.86<br>(0.72-1)    | 0.85<br>(0.76-0.94) | 0.84<br>(0.76-0.92) | 0.74<br>(0.67-0.82) | 0.94<br>(0.88-1)    | 0.93<br>(0.87-0.99) | 0.92<br>(0.88-0.96) | 0.86<br>(0.82-0.9)  |  |  |
|          | 18 months | 0.79<br>(0.66-0.92) | 0.78<br>(0.69-0.86) | 0.77<br>(0.7-0.84)  | 0.69<br>(0.62-0.75) | 0.87<br>(0.76-0.97) | 0.89<br>(0.82-0.96) | 0.88<br>(0.83-0.92) | 0.82<br>(0.77-0.88) |  |  |
|          | 1 year    | 0.73<br>(0.55-0.91) | 0.66<br>(0.57-0.75) | 0.65<br>(0.59-0.71) | 0.61<br>(0.56-0.66) | 0.88<br>(0.77-0.99) | 0.84<br>(0.77-0.91) | 0.83<br>(0.76-0.89) | 0.80<br>(0.73-0.86) |  |  |
|          |           | 1 year              | 3 years             | 5 years             | 8 years             | 1 year              | 3 years             | 5 years             | 8 years             |  |  |
|          |           | horizon time        |                     |                     |                     | horizon time        |                     |                     |                     |  |  |

**Table S3:** Comparison of AB alone (Panel a) to the 3-variable model of AB, GRS2 and FH (Panel b) at 8 different landmark scoring ages and over 4 different horizon times. Although 95% confidence intervals overlapped, among 30 total combinations, the 3-variable model yielded larger AUC ROC in 28, and similar results in the remaining 2 combinations. The differences were often substantial, especially at landmarks  $\leq 4$  years of age.

| Autoanti-body status | Genetic risk | Family history | 1 year horizon |             | 3 year horizon |             | 5 year horizon |             |
|----------------------|--------------|----------------|----------------|-------------|----------------|-------------|----------------|-------------|
|                      |              |                | Sensitivity    | Specificity | Sensitivity    | Specificity | Sensitivity    | Specificity |
| 0                    | ++           | No             | 100.0%         | 17.6%       | 100.0%         | 17.7%       | 100.0%         | 17.7%       |
| 0                    | ++           | Yes            | 97.8%          | 57.3%       | 95.3%          | 57.4%       | 93.6%          | 57.7%       |
| 0                    | +++          | No             | 97.8%          | 76.9%       | 91.8%          | 77.3%       | 87.9%          | 77.5%       |
| 0                    | +++          | Yes            | 87.0%          | 93.9%       | 85.1%          | 94.2%       | 78.6%          | 94.6%       |
| 1                    | ++           | No             | 80.3%          | 96.7%       | 80.5%          | 97.1%       | 75.5%          | 97.5%       |
| 1                    | ++           | Yes            | 76.0%          | 97.4%       | 73.6%          | 97.8%       | 69.3%          | 98.2%       |
| 1                    | +++          | No             | 73.7%          | 97.8%       | 71.2%          | 98.2%       | 66.9%          | 98.6%       |
| 1                    | +++          | Yes            | 58.6%          | 98.5%       | 58.9%          | 98.8%       | 58.7%          | 99.2%       |
| 2                    | ++           | No             | 73.7%          | 97.9%       | 71.2%          | 98.3%       | 66.9%          | 98.6%       |
| 2                    | ++           | Yes            | 54.1%          | 98.6%       | 51.9%          | 98.9%       | 54.1%          | 99.3%       |
| 2                    | +++          | No             | 41.2%          | 99.0%       | 34.8%          | 99.2%       | 40.4%          | 99.6%       |
| 2                    | +++          | Yes            | 13.3%          | 99.6%       | 9.0%           | 99.7%       | 11.8%          | 99.8%       |
| 3                    | ++           | No             | 58.6%          | 98.5%       | 58.9%          | 98.8%       | 58.7%          | 99.2%       |
| 3                    | ++           | Yes            | 36.8%          | 99.2%       | 31.4%          | 99.3%       | 36.5%          | 99.6%       |
| 3                    | +++          | No             | 21.9%          | 99.5%       | 18.0%          | 99.6%       | 20.2%          | 99.7%       |
| 3                    | +++          | Yes            | 4.5%           | 100.0%      | 2.3%           | 99.9%       | 2.3%           | 100.0%      |

**Table S4** Sensitivity and specificity given future T1D risk probabilities for 16 different scenarios combining a GRS and FH background risk level with different AB status for two-year-old children. “++” represents a genetic risk score at 90<sup>th</sup> percentile of the general (UK) population. “+++” represents a genetic risk score at 99<sup>th</sup> percentile of the general (UK) population.

| landmark/<br>horizon | T1D<br>children<br>caught | T1D<br>children<br>missed | % of T1D<br>caught per<br>period | % of<br>people in<br>the cohort | cumulative<br>caught | cumulative<br>missed | cumulative<br>evaluations |
|----------------------|---------------------------|---------------------------|----------------------------------|---------------------------------|----------------------|----------------------|---------------------------|
| 0/1                  | 10                        | 0                         | 100%                             | 100%                            | 10                   | 0                    | 7798                      |
| 1/1                  | 36                        | 0                         | 100%                             | 100%                            | 46                   | 0                    | 38050                     |
| 2/1                  | 31                        | 0                         | 100%                             | 100%                            | 77                   | 0                    | 65270                     |
| 3/1                  | 20                        | 0                         | 100%                             | 100%                            | 97                   | 0                    | 77902                     |
| 4/1                  | 34                        | 0                         | 100%                             | 100%                            | 131                  | 0                    | 89848                     |
| 5/1                  | 24                        | 0                         | 100%                             | 100%                            | 155                  | 0                    | 101260                    |
| 6/1                  | 20                        | 0                         | 100%                             | 100%                            | 175                  | 0                    | 106777                    |
| 7/1                  | 27                        | 0                         | 100%                             | 100%                            | 202                  | 0                    | 112100                    |
| 8/2                  | 46                        | 0                         | 100%                             | 100%                            | 248                  | 0                    | 117234                    |

**Table S5A:** Visit number calculations for the “Classic” design. Infants initially selected for high GRS2 genetic risk were all followed quarterly until age 3, and every 6 months until age 6, then annually thereafter. Simulation made on the TEDDY dataset.

| Landmark/<br>horizon | T1D<br>children<br>caught | T1D<br>children<br>missed | % of T1D<br>caught per<br>year | % of<br>people in<br>the cohort | cumulative<br>caught | cumulative<br>missed | cumulative<br>evaluations |
|----------------------|---------------------------|---------------------------|--------------------------------|---------------------------------|----------------------|----------------------|---------------------------|
| 0/1                  | 10                        | 0                         | 100%                           | 100%                            | 10                   | 0                    | 7798                      |
| 1/1                  | 36                        | 0                         | 100%                           | 95.7%                           | 46                   | 0                    | 36742                     |
| 2/1                  | 31                        | 0                         | 100%                           | 94.9%                           | 77                   | 0                    | 62630                     |
| 3/1                  | 20                        | 1                         | 95.%                           | 78.2%                           | 97                   | 1                    | 72552                     |
| 4/1                  | 34                        | 6                         | 85%                            | 46.6%                           | 131                  | 7                    | 78140                     |
| 5/1                  | 24                        | 2                         | 92.3%                          | 23.6%                           | 155                  | 9                    | 80838                     |
| 6/1                  | 20                        | 3                         | 87.0%                          | 8.5%                            | 175                  | 12                   | 81305                     |
| 7/1                  | 22                        | 2                         | 91.7%                          | 6.7%                            | 197                  | 14                   | 81640                     |
| 8/2                  | 36                        | 1                         | 97.3%                          | 6.5%                            | 233                  | 15                   | 81937                     |

**Table S5B:** Visit number calculations for the “Simple Adaptive” design. Infants selected for high genetic risk were initially followed as in the Classic strategy, but the T1D CRS was recalculated at annual landmarks, at which time any child whose T1D probability by age 10 had decreased to <0.008 was eliminated from further follow-up. Of new cases, 94% had high risk detected before onset. Simulation made on the TEDDY dataset.

| landmark/<br>horizon | T1D<br>children<br>caught | T1D<br>children<br>missed | % of T1D<br>caught per<br>period | % of<br>people in<br>the cohort | cumulative<br>caught | cumulative<br>missed | cumulative<br>evaluations |
|----------------------|---------------------------|---------------------------|----------------------------------|---------------------------------|----------------------|----------------------|---------------------------|
| 0/1                  | 8                         | 2                         | 80.0%                            | 25.8%                           | 8                    | 2                    | 7798                      |
| 1/1                  | 32                        | 4                         | 88.9%                            | 28.4%                           | 40                   | 6                    | 21811                     |
| 2/1                  | 28                        | 3                         | 90.3%                            | 6.7%                            | 68                   | 9                    | 29993                     |
| 3/1                  | 18                        | 2                         | 90.0%                            | 5.5%                            | 86                   | 11                   | 36656                     |
| 4/2                  | 56                        | 2                         | 96.6%                            | 6.4%                            | 142                  | 13                   | 43772                     |
| 6/2                  | 44                        | 3                         | 93.6%                            | 7.7%                            | 186                  | 16                   | 49714                     |
| 8/2                  | 42                        | 4                         | 91.3%                            | 8.5%                            | 228                  | 20                   | 54848                     |

**Table S5C:** Visit number calculations for the “Advanced Adaptive” design. Infants selected for high genetic risk were initially followed as in the Classic strategy, but at birth and annually thereafter, a T1D CRS calculation was used to reallocate children among the quarterly or annual surveillance groups based on T1D probability in 2 years of  $\geq 0.006$  or  $< 0.006$ , respectively. Of new cases, 92% had high risk detected before onset. Simulation made on the TEDDY dataset.

| <b>Variable</b>                | <b>non T1D (7493)</b> | <b>T1D (305)</b> |     |
|--------------------------------|-----------------------|------------------|-----|
| Country                        | USA                   | 3143             | 103 |
|                                | Finland               | 1612             | 89  |
|                                | Germany               | 507              | 28  |
|                                | Sweden                | 2231             | 85  |
| First degree relative with T1D | no                    | 6691             | 221 |
|                                | yes                   | 802              | 84  |
| Mother T1D                     | no                    | 7214             | 283 |
|                                | yes                   | 279              | 22  |
| Father T1D                     | no                    | 7131             | 260 |
|                                | yes                   | 362              | 45  |
| Siblings T1D                   | no                    | 7381             | 280 |
|                                | yes                   | 112              | 25  |
| HLA genotype                   | other                 | 340              | 17  |
|                                | DR4/DR3               | 2835             | 166 |
|                                | DR4/DR4               | 1464             | 55  |
|                                | DR4/DR8               | 1277             | 42  |
|                                | DR3/DR3               | 1577             | 25  |
| Sex                            | Female                | 3684             | 148 |
|                                | Male                  | 3809             | 157 |
| Caesarean section              | no                    | 5542             | 223 |
|                                | yes                   | 1951             | 82  |

**Table S6:** Numbers of diabetic and non-diabetic children in the cohort by model variable.

| Chromosome | SNP              | MAF    | Minor allele | Major allele | r <sup>2</sup> |
|------------|------------------|--------|--------------|--------------|----------------|
| 1          | rs2476601        | 0.1083 | A            | G            | Genotyped      |
| 1          | rs3024505        | 0.1509 | A            | G            | Genotyped      |
| 2          | rs2111485        | 0.4118 | A            | G            | Genotyped      |
| 2          | rs3087243        | 0.3982 | A            | G            | Genotyped      |
| 4          | rs17388568       | 0.3064 | A            | G            | Genotyped      |
| 6          | rs9500974        | 0.0060 | T            | G            | Genotyped      |
| 6          | rs72848653       | 0.0686 | T            | C            | 0.915          |
| 6          | rs76569729       | 0.1268 | T            | C            | 0.944          |
| 6          | rs144530872      | 0.0160 | A            | G            | 0.959          |
| 6          | rs12153924       | 0.3001 | A            | G            | 0.979          |
| 6          | rs12189871       | 0.0330 | T            | C            | Genotyped      |
| 6          | 6:31274793_G_GC  | 0.0073 | GC           | G            | 0.808          |
| 6          | rs371250843      | 0.0463 | T            | TG           | 0.996          |
| 6          | rs16899379       | 0.0025 | A            | G            | 0.933          |
| 6          | rs149663102      | 0.0100 | T            | TG           | 0.994          |
| 6          | rs2524277        | 0.0104 | A            | G            | Genotyped      |
| 6          | rs116522341      | 0.0610 | G            | C            | 0.791          |
| 6          | rs75658393       | 0.0318 | C            | T            | 0.992          |
| 6          | rs9269173        | 0.0528 | A            | T            | 0.977          |
| 6          | rs9271346        | 0.0011 | C            | T            | 0.892          |
| 6          | rs1281934        | 0.0039 | G            | A            | 0.544          |
| 6          | rs9405117        | 0.0073 | A            | C            | 0.358          |
| 6          | rs111485156      | 0.0003 | C            | T            | 0.889          |
| 6          | rs9273369        | 0.4008 | C            | T            | Genotyped      |
| 6          | rs10947332       | 0.0109 | A            | G            | Genotyped      |
| 6          | rs12527228       | 0.0814 | T            | C            | 0.981          |
| 6          | rs7454108        | 0.4878 | G            | A            | Genotyped      |
| 6          | rs6934289        | 0.1117 | C            | T            | 0.998          |
| 6          | rs17214657       | 0.1346 | C            | T            | Genotyped      |
| 6          | rs2567287        | 0.0086 | A            | G            | 0.998          |
| 6          | rs9378176        | 0.0154 | G            | A            | 0.999          |
| 6          | 6:33071027_C_CTA | 0.1583 | CTA          | C            | 0.944          |
| 6          | rs72928038       | 0.1573 | A            | G            | Genotyped      |
| 6          | rs9388489        | 0.4641 | G            | A            | Genotyped      |
| 6          | rs1738074        | 0.4308 | T            | C            | Genotyped      |
| 7          | rs4948088        | 0.0457 | A            | C            | Genotyped      |
| 9          | rs6476839        | 0.4213 | A            | T            | Genotyped      |
| 10         | rs61839660       | 0.0745 | T            | C            | Genotyped      |
| 10         | rs41295121       | 0.0092 | T            | C            | Genotyped      |



|    |             |        |   |   |           |
|----|-------------|--------|---|---|-----------|
| 10 | rs60888743  | 0.2500 | G | A | 0.998     |
| 11 | rs3842753   | 0.2540 | T | G | 0.968     |
| 12 | rs10492166  | 0.4889 | A | G | Genotyped |
| 12 | rs11170466  | 0.0635 | T | C | 0.466     |
| 12 | rs4759229   | 0.3286 | A | G | Genotyped |
| 12 | rs653178    | 0.4486 | C | T | Genotyped |
| 13 | rs9585056   | 0.2507 | C | T | Genotyped |
| 14 | rs56994090  | 0.4421 | C | T | Genotyped |
| 15 | rs72727394  | 0.2064 | T | C | Genotyped |
| 15 | rs2289702   | 0.1026 | T | C | 0.988     |
| 16 | rs12708716  | 0.3349 | G | A | Genotyped |
| 16 | rs9924471   | 0.1450 | A | G | Genotyped |
| 18 | rs1893217   | 0.1612 | G | A | Genotyped |
| 18 | rs1615504   | 0.4821 | T | C | Genotyped |
| 19 | rs144309607 | 0.0070 | T | C | 0.514     |
| 19 | rs425105    | 0.1585 | C | T | Genotyped |
| 20 | rs2281808   | 0.3306 | T | C | 0.996     |
| 21 | rs9981624   | 0.3277 | G | C | Genotyped |
| 22 | rs5763779   | 0.3403 | A | G | Genotyped |
| 22 | rs229541    | 0.4207 | A | G | Genotyped |

**Table S7** The 59 SNPs used in the T1D GRS2 with the Minor allele frequency and when needed the imputation score  $r^2$ . A total of 8 SNPs from the published GRS2 are not used because they mark HLA-DQ haplotypes not included in the TEDDY cohort.

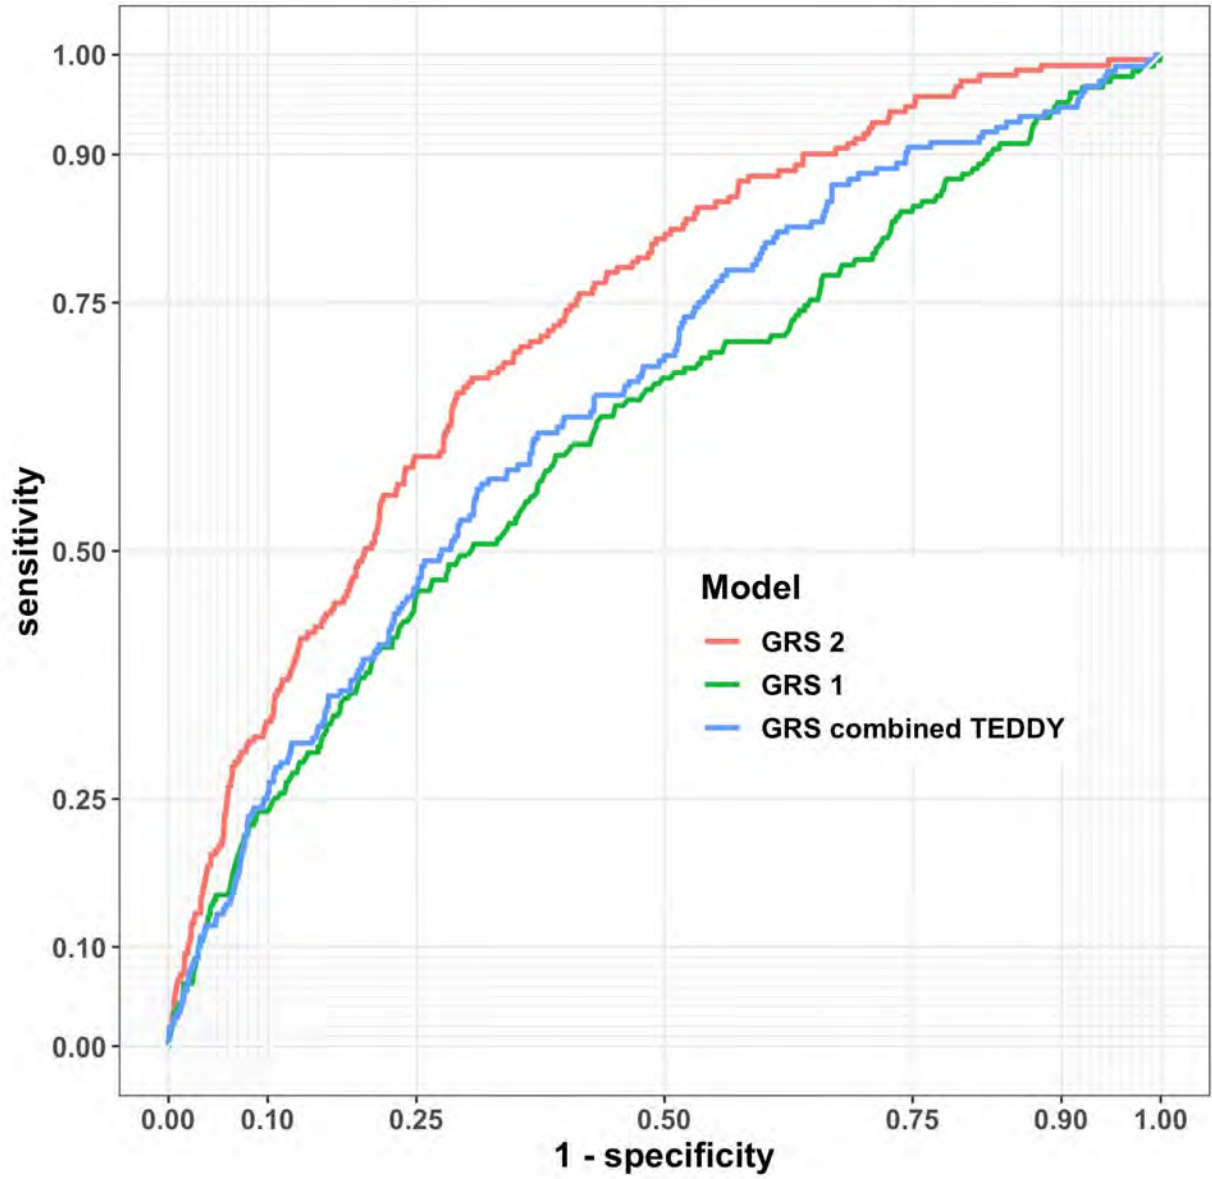

**Figure S1:** ROC curves comparing GRS1<sup>33</sup>, GRS2<sup>24</sup> and the combined TEDDY GRS<sup>19</sup> to predict T1D from a landmark age of birth, horizon of 8 years.

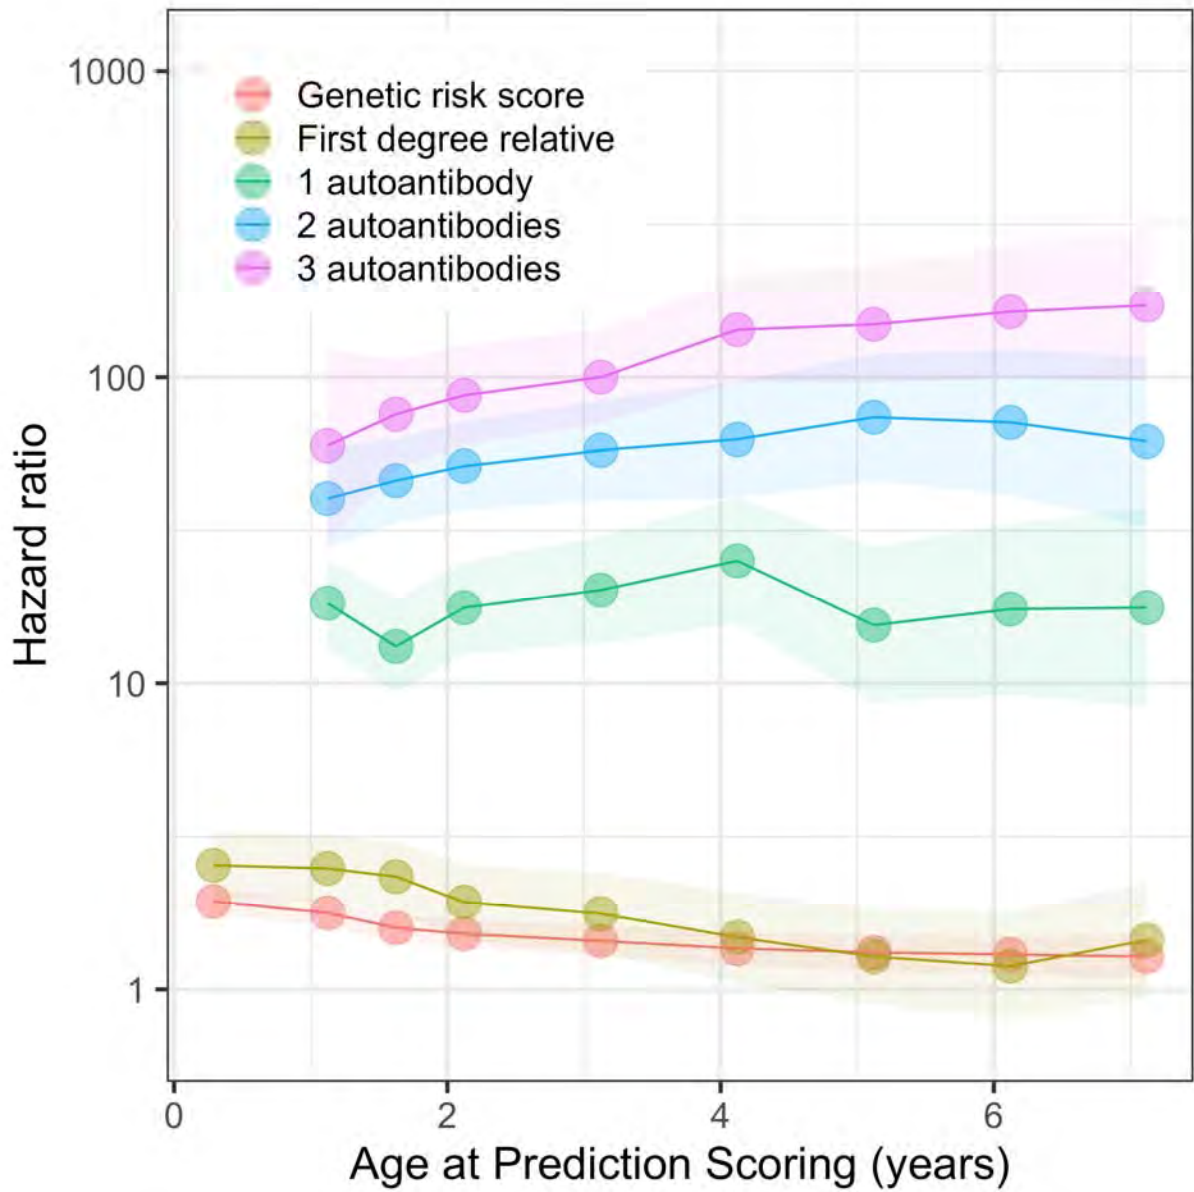

**Figure S2:** Hazard ratio for each variable at different ages at prediction scoring (landmarks).

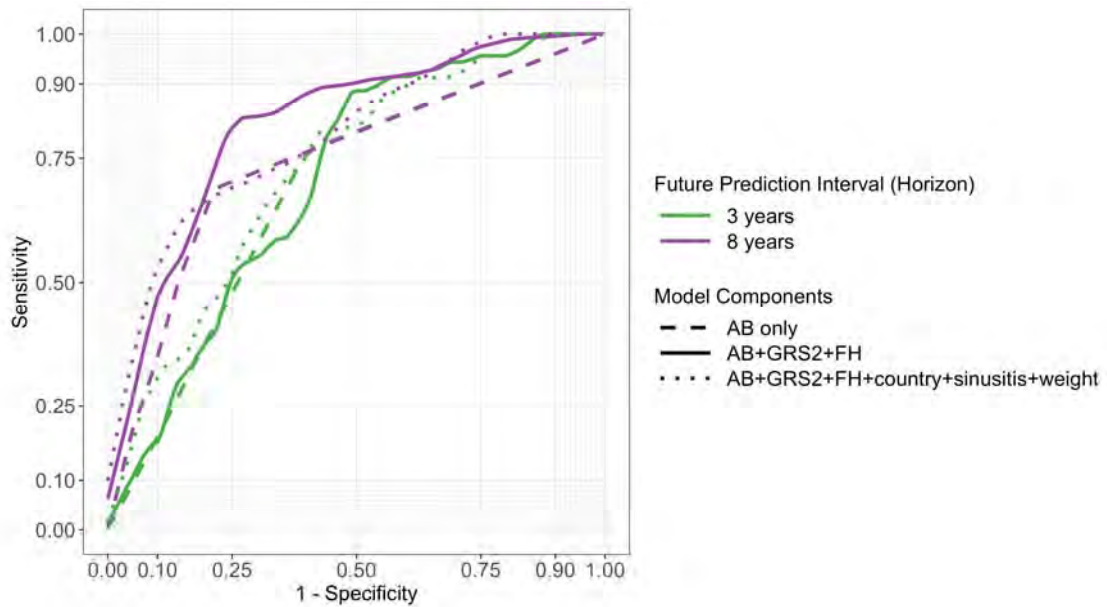

**Figure S3-** Time dependent ROC of the different models now including only children positive for at least one AB. The landmark age is two years. At a 3 year horizon the CRS (AB+GRS2+FH) performs similarly to AB only, but at an 8 year horizon the CRS is more predictive.

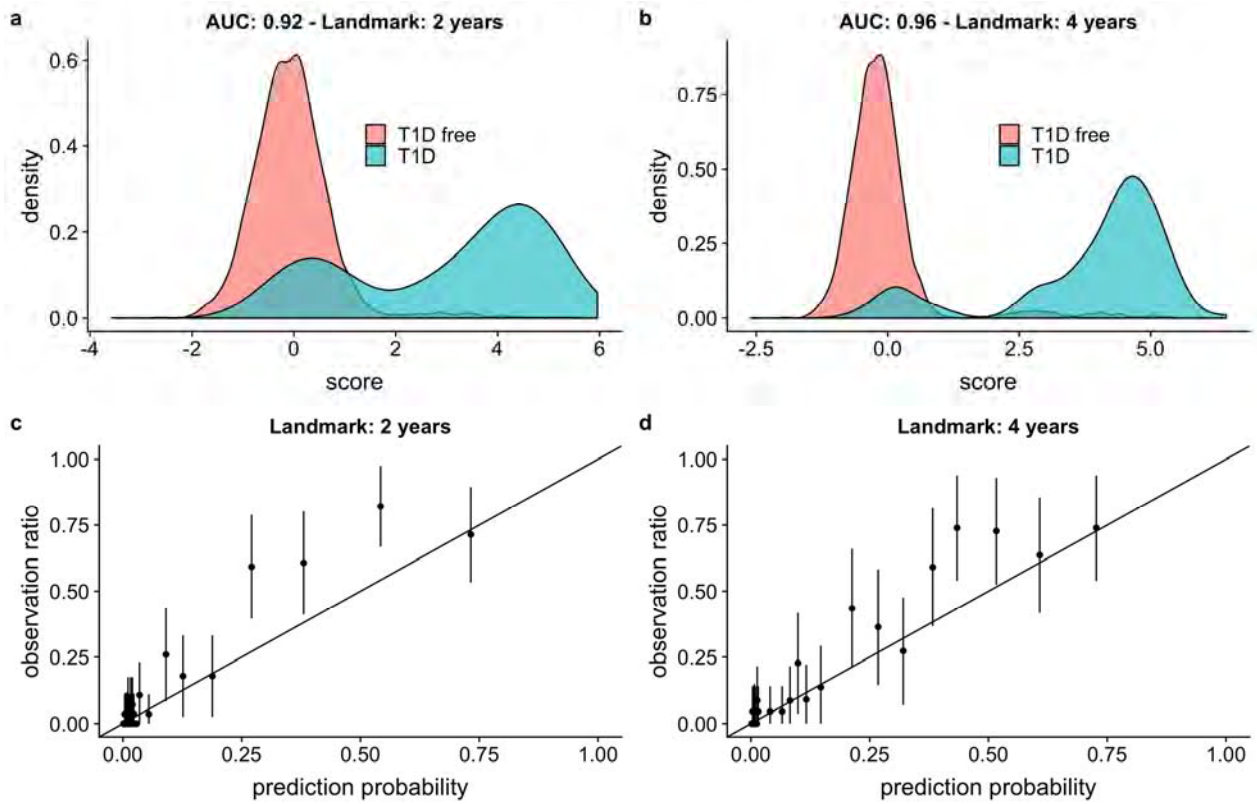

**Figure S4, Panels a and b:** score distribution for 3-variable model at a horizon time of 5 years for a) landmark at 2 year, b) landmark at 4 years with increases in AUC ROC as noted on the figure. The T1D CRS was generated by the linear predictor of the parametric part of the hazard function of the Cox model.

**Panels c and d:** calibration plot for 3-variable model at a horizon time of 5 years and c) landmark at 2 years and d) landmark at 4 years. The predictions are grouped into centiles based on their predicted values, and then the bin prevalence (the ratio of plots in this bin with observed values of present versus the total number of plots in this bin) is calculated for each bin.

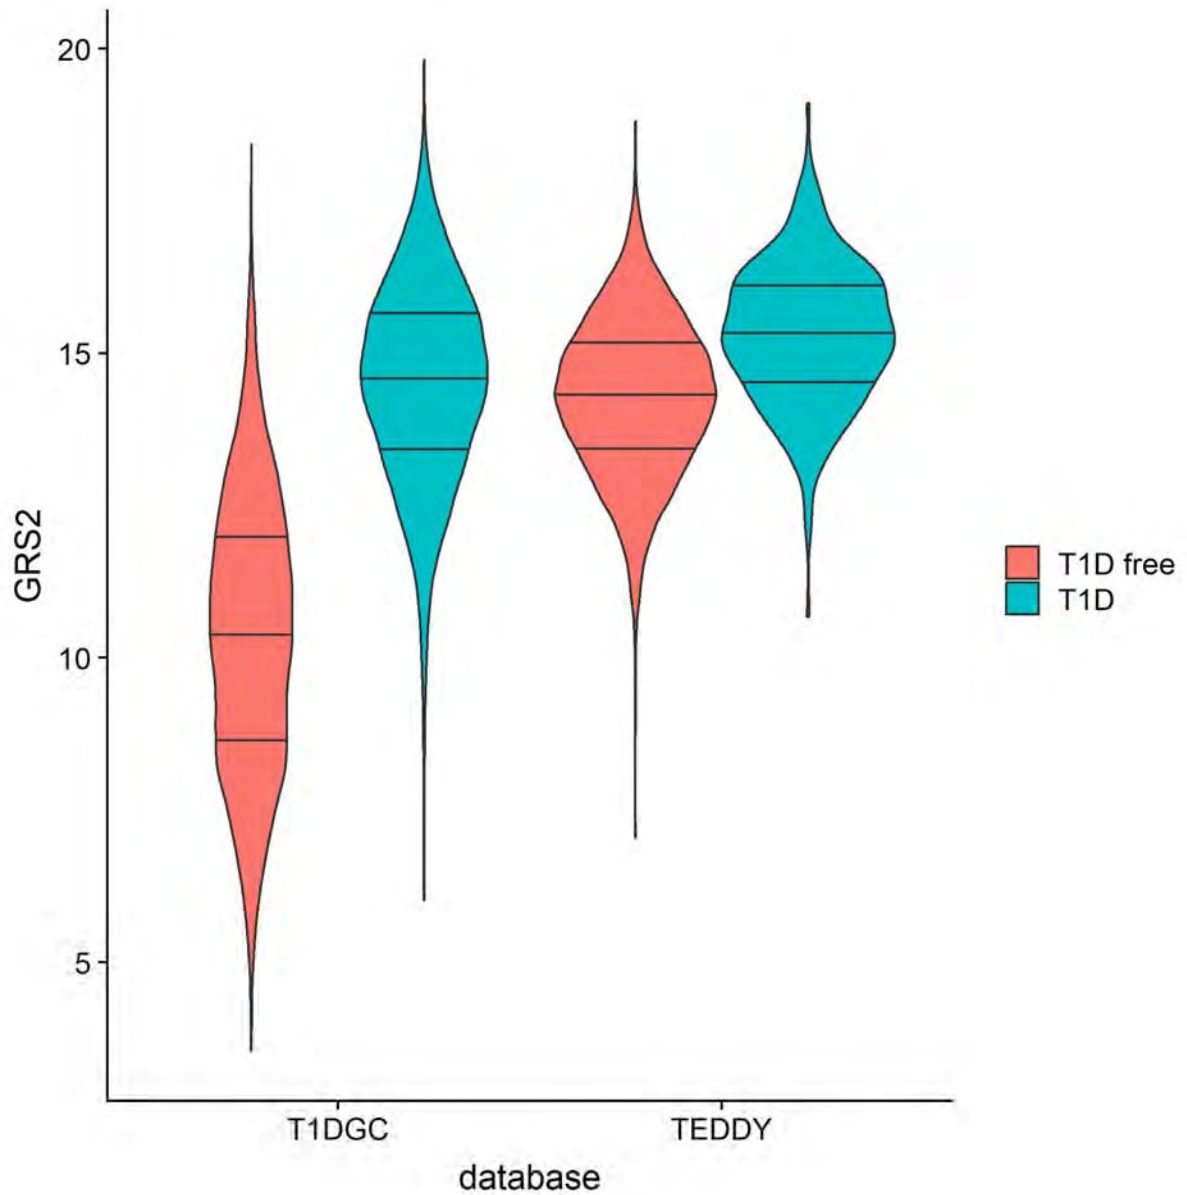

**Figure S5.** GRS2 violin plot in the Type 1 Diabetes Genetics Consortium (T1DGC) and TEDDY datasets. T1DGC is more representative of the general background population. The genetic pre-selection in TEDDY based on the major T1D risk locus HLA-DR-DQ, renders the T1D GRS2 higher in TEDDY, even in T1D free subjects. Further, the separation between T1D and non-T1D subjects in TEDDY is much less.
